# Supplementary material
Source: PubMed Central journal article supplement (PMC8081387)
Supplement: NIHMS1689763-supplement-1.pdf [file NIHMS1689763-supplement-1.pdf]

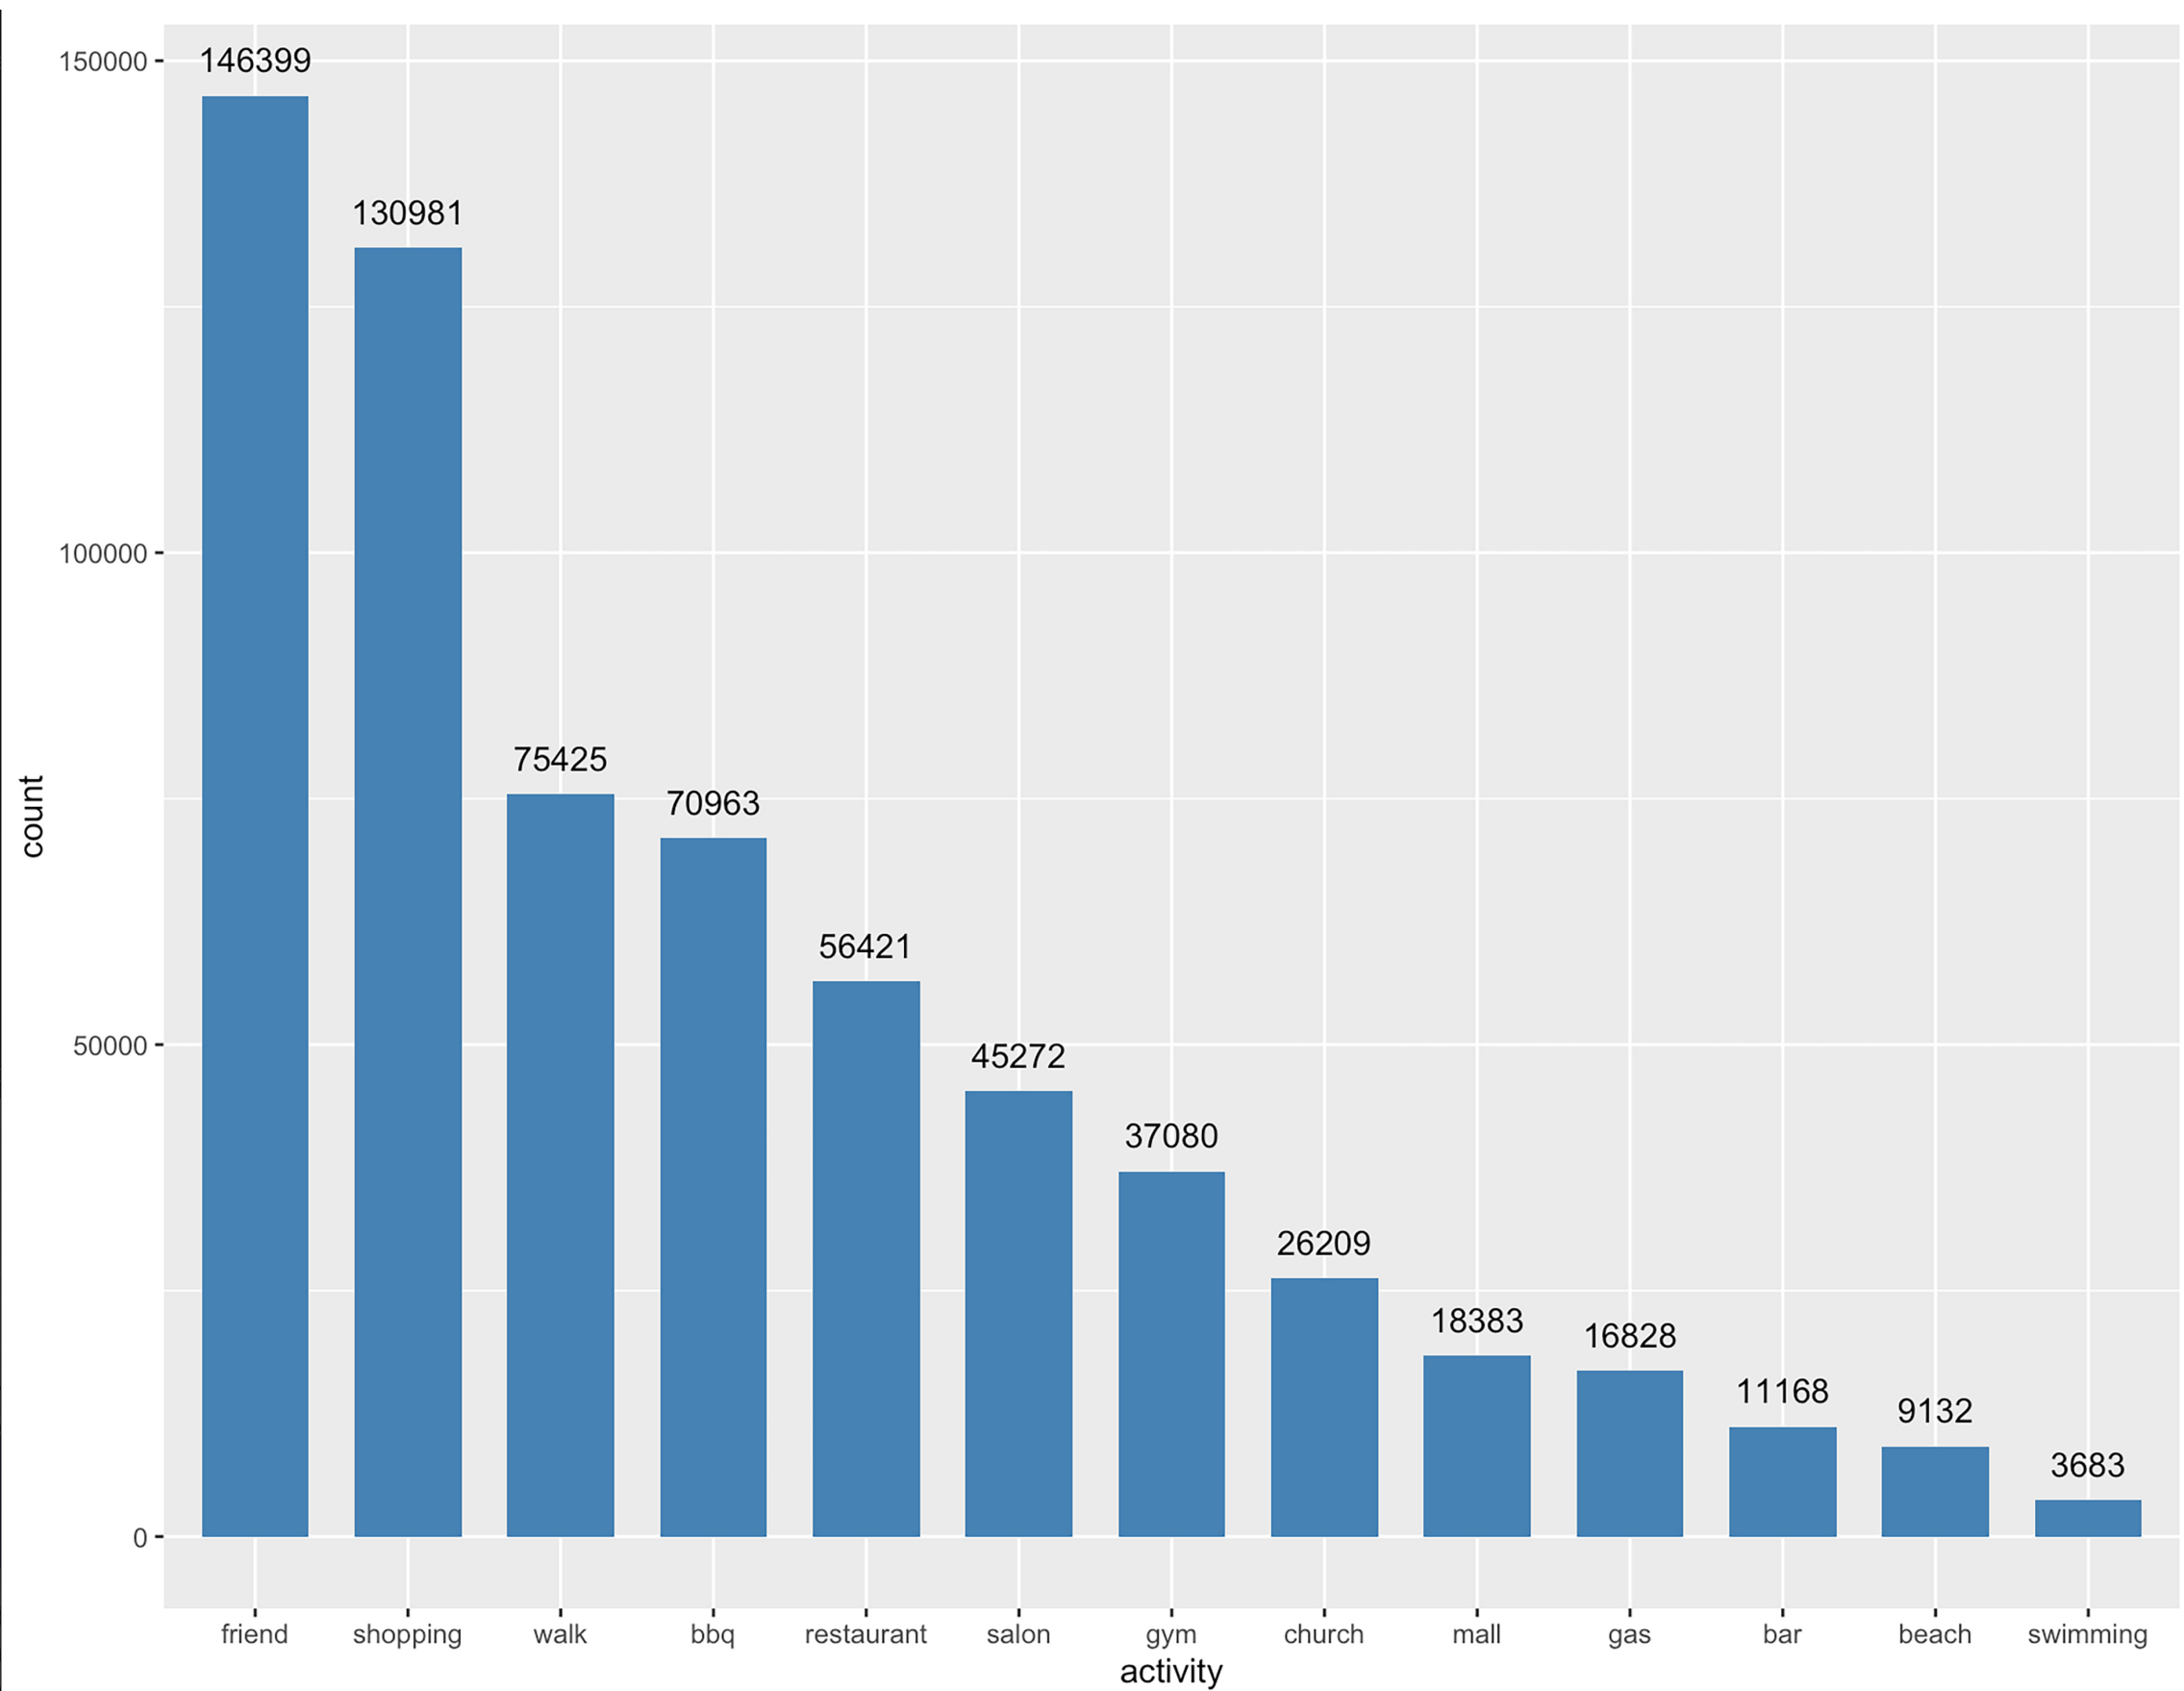

| Original Estimate    | Post Mitigation Estimate | n (%)                  |
|----------------------|--------------------------|------------------------|
| <b>High Risk</b>     |                          | <b>4,526 (2.66%)</b>   |
|                      | High Risk                | 221 (0.13%)            |
|                      | Medium Risk              | 1,242 (0.73%)          |
|                      | Low Risk                 | 3,046 (1.79%)          |
|                      | Very Low Risk            | 17 (<0.01%)            |
| <b>Medium Risk</b>   |                          | <b>20,093 (11.81%)</b> |
|                      | Medium Risk              | 732 (0.43%)            |
|                      | Low Risk                 | 18,375 (10.80%)        |
|                      | Very Low Risk            | 987 (0.58%)            |
| <b>Low Risk</b>      |                          | <b>90,345 (53.10%)</b> |
|                      | Low Risk                 | 52,387 (30.79%)        |
|                      | Very Low Risk            | 37,959 (22.31%)        |
| <b>Very Low Risk</b> |                          | <b>55,178 (32.43%)</b> |
